# Supplementary material
Source: publisher site journal article supplement (https://www.dovepress.com/article/486192)
Supplement: Supplementary file 1 [file get_supplementary_file.php]

**Supplementary Material**

**Supplementary Table 1** The Moderated Chain Mediation Model in Male Adolescents

| Path | *β* | 95% CI | | *SE* |
| --- | --- | --- | --- | --- |
| Lower | Upper |
| **Direct effects** |  |  |  |  |
| Family communication → PIU | -0.135** | -0.212 | -0.057 | 0.039 |
| Family communication → Loneliness | -0.243*** | -0.320 | -0.167 | 0.039 |
| Loneliness→ PIU | 0.156** | 0.057 | 0.252 | 0.050 |
| Family communication → Depression | -0.055 | -0.124 | 0.014 | 0.036 |
| Depression → PIU | 0.271*** | 0.168 | 0.376 | 0.053 |
| Loneliness → Depression | 0.649*** | 0.567 | 0.724 | 0.040 |
| Developmental stage → PIU | 0.055 | -0.009 | 0.122 | 0.033 |
| **Indirect effects** |  |  |  |  |
| Family communication → Loneliness → PIU | -0.038** | -0.068 | -0.015 | 0.013 |
| Family communication → Depression → PIU (early adolescence) | -0.009 | -0.033 | 0.001 | 0.008 |
| Family communication → Depression → PIU (late adolescence) | -0.021 | -0.047 | 0.004 | 0.013 |
| Family communication → Loneliness → Depression → PIU (early adolescence) | -0.026* | -0.056 | -0.004 | 0.013 |
| Family communication → Loneliness → Depression → PIU (late adolescence) | -0.059*** | -0.088 | -0.037 | 0.013 |
| **Moderating effects** |  |  |  |  |
| Depression*Developmental stage → PIU | 0.104* | 0.016 | 0.182 | 0.043 |
| **Index of moderated mediation** | -0.016* | -0.031 | -0.004 | 0.007 |

*Notes. N =* 1377; **p* < 0.05, ***p* < 0.01,****p* < 0.001. CI, confidence interval. *SE*, Standard Error.

**Supplementary Table 2** The Moderated Chain Mediation Model in Female Adolescents

| Path | *β* | 95% CI | | *SE* |
| --- | --- | --- | --- | --- |
| Lower | Upper |
| **Direct effects** |  |  |  |  |
| Family communication → PIU | -0.105* | -0.192 | -0.023 | 0.043 |
| Family communication → Loneliness | -0.359*** | -0.436 | -0.278 | 0.041 |
| Loneliness→ PIU | 0.216*** | 0.122 | 0.312 | 0.048 |
| Family communication → Depression | -0.118** | -0.194 | -0.041 | 0.039 |
| Depression → PIU | 0.307*** | 0. 205 | 0.402 | 0.051 |
| Loneliness → Depression | 0.621*** | 0.541 | 0.699 | 0.041 |
| Developmental stage → PIU | 0.074* | 0.005 | 0.139 | 0.034 |
| **Indirect effects** |  |  |  |  |
| Family communication → Loneliness → PIU | -0.078*** | -0.120 | -0.045 | 0.019 |
| Family communication → Depression → PIU (early adolescence) | -0.034* | -0.067 | -0.011 | 0.014 |
| Family communication → Depression → PIU (late adolescence) | -0.038** | -0.072 | -0.014 | 0.015 |
| Family communication → Loneliness → Depression → PIU (early adolescence) | -0.063*** | -0.099 | -0.034 | 0.016 |
| Family communication → Loneliness → Depression → PIU (late adolescence) | -0.072*** | -0.106 | -0.045 | 0.016 |
| **Moderating effects** |  |  |  |  |
| Depression*Developmental stage → PIU | 0.020 | -0.056 | 0.092 | 0.037 |
| **Index of moderated mediation** | -0.004 | -0.021 | 0.012 | 0.008 |

*Notes. N =* 1377; **p* < 0.05, ***p* < 0.01,****p* < 0.001. CI, confidence interval. *SE*, Standard Error.
